# Supplementary material for: Glutamate Dehydrogenase Functions in Glutamic Acid Metabolism and Stress Resistance in Pyropia haitanensis
Source: MDPI journal article supplement (doi:10.3390/molecules26226793), 2021-11-10
Supplement: s1 [file s1]

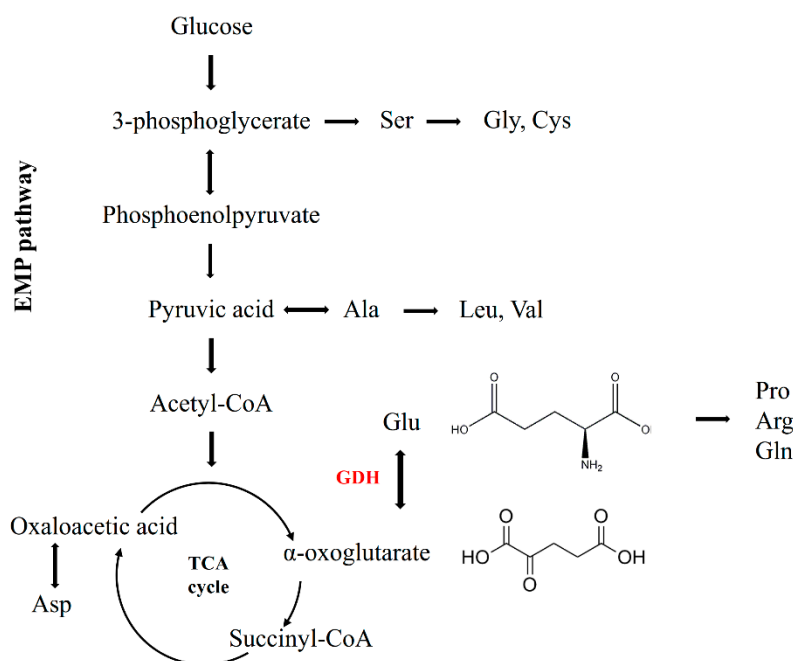

**Figure S1.** The glutamic acid biosynthetic pathway adapted from Kyoto Encyclopedia of Genes and Genomes (KEGG) pathway map01230. Abbreviations amino acid: Ser: serine; Gly: glycine; Cys: cystine; Ala: alanine; Leu: leucine; Val: valine, Glu: glutamic acid; Pro: proline; Arg: arginine; Gln: Glutamine; Asp: Aspartic acid.

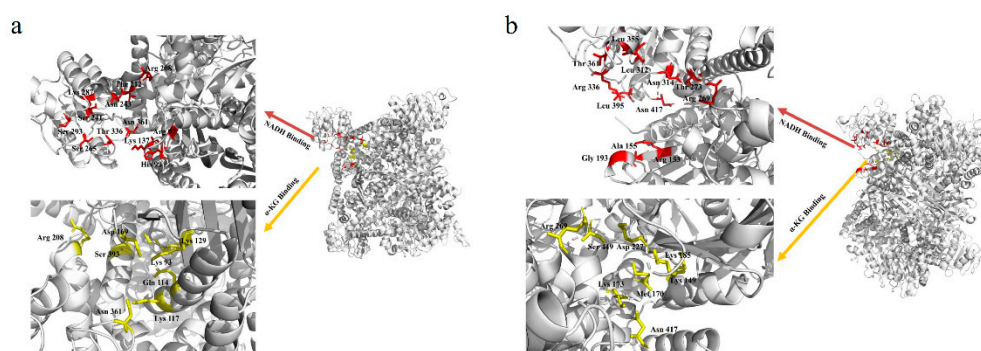

**Figure S2.** The predicted tertiary structures of PhGDH1 (a) and PhGDH2 (b). The presumed cofactor-binding sites are marked in red while the presumed substrate-binding sites in yellow.

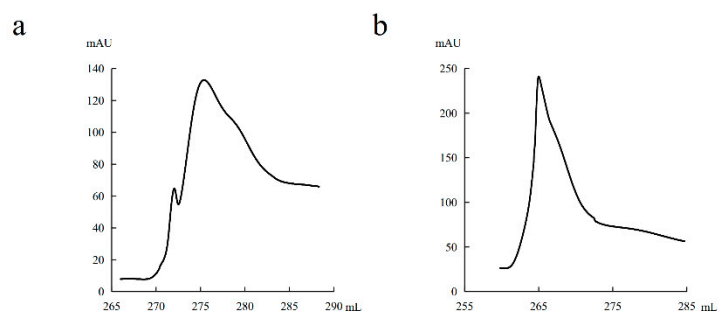

**Figure S3.** Purification of the recombinant PhGDHs. (a) The eluting peak of PhGDH1. (b) The eluting peak of PhGDH2.

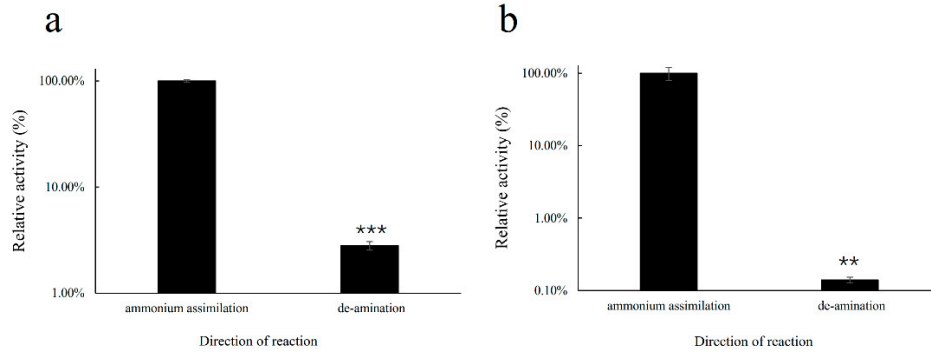

**Figure S4.** Comparisons of the relative activities between the direction of ammonium decomposition and ammonium assimilation for PhGDH1 (a) and PhGDH2 (b). \*P < 0.05, \*\*P < 0.01, and \*\*\*P < 0.001.

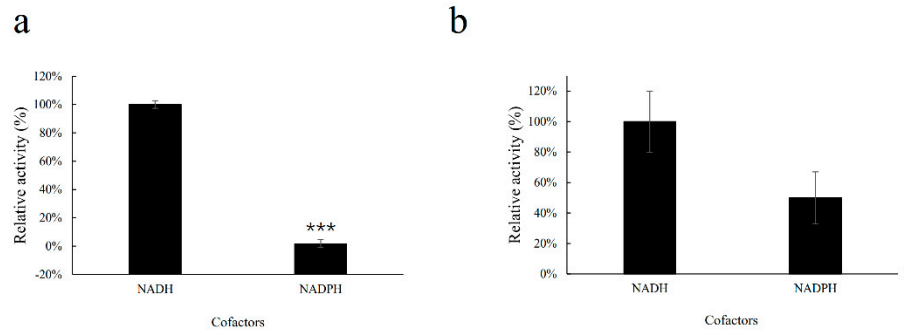

**Figure S5.** Relative activity of PhGDH1(a) and PhGDH2 (b) using the two cofactors. \*P < 0.05, \*\*P < 0.01, and \*\*\*P < 0.001.

**Table S1.** The  $K_{cat}$  values as well as  $K_m$ ,  $V_m$  and  $K_{cat}/K_m$  of the PhGDH1/PhGDH2.

|        | substrate                         | $K_m$ (mM) | $V_m$<br>( $\mu\text{mol}\cdot\text{min}^{-1}\cdot\text{mg}^{-1}$ ) | $K_{cat}$ ( $\text{S}^{-1}$ ) | $K_{cat}/K_m$ ( $\text{S}^{-1}\cdot\text{mM}^{-1}$ ) |
|--------|-----------------------------------|------------|---------------------------------------------------------------------|-------------------------------|------------------------------------------------------|
| PhGDH1 | NADH                              | 0.12       | 1.3                                                                 | 1.52                          | 12.67                                                |
|        | ( $\text{NH}_4$ ) $_2\text{SO}_4$ | 4.99       | 0.65                                                                | 0.76                          | 6.33                                                 |
|        | $\alpha$ -oxoglutarate            | 0.16       | 0.65                                                                | 0.76                          | 6.33                                                 |
| PhGDH2 | NADH                              | 0.02       | 0.39                                                                | 0.38                          | 3.17                                                 |
|        | ( $\text{NH}_4$ ) $_2\text{SO}_4$ | 3.98       | 0.32                                                                | 0.31                          | 2.58                                                 |
|        | $\alpha$ -oxoglutarate            | 0.104      | 0.32                                                                | 0.31                          | 2.58                                                 |

**Table S2.** The RPKM values of glutamine synthetase. PT: Putian (Fujian Province), YC: Yancheng (Jiangsu Province). 1, 2, and 3 indicate samples collected in October, November, and December, respectively.

|     | Unigene0045080 | Unigene0046035 | Unigene0050875 |
|-----|----------------|----------------|----------------|
| PT1 | 0.073          | 0.393          | 0.11           |
| PT2 | 0.11           | 0.063          | 0              |
| PT3 | 0.253          | 0.19           | 0.063          |
| YC1 | 0              | 0              | 0.11           |
| YC2 | 0.07           | 0.067          | 0              |
| YC3 | 0              | 0.13           | 0              |

**Table S3.** The variable-to-maximum fluorescence ( $F_v/F_m = (F_m - F_0)/F_m$ ) was measured before abiotic stresses.

|                      | Area 1 | Area 2 | Area 3 |
|----------------------|--------|--------|--------|
| Size [pixels]        | 11001  | 5926   | 4595   |
| $F_0$                | 115.22 | 95.01  | 124.92 |
| $F_m$                | 370.18 | 286.21 | 317.43 |
| $F_v$                | 254.97 | 191.2  | 192.51 |
| QY_max ( $F_v/F_m$ ) | 0.69   | 0.67   | 0.56   |

**Table S4.** The coding sequences of *PhGDH1/PhGDH2*.

#### PhGDH1

ATGTCGGGCCTGTCGGCCAAGCTGCAGCCGGTGTGTTGACGCGATCAAGGCACGCAACTCCAACGAGCCCGAGTTCCTCCAGGCCGCTGAAG  
AGATTCTCCACTCGTTGGGTCCCGTCATCGAGGCTGACGGCGGTGACAAAGTACATTCCGGTCACCAAGGCTCTGTTGAGCCGGAGCGTGTG  
ATCCAGTTCGCGTTGCTGGTACGATGACGACGGGGAGCTGCAAGTCAACCGTGGCTTCCGGGTGCAAATGAACTCGGCTATCGGGCCGT  
ACAAGGGCGGGCTTCGGCTCCACTGTCAACCTCTCTATCCTCAAGTTCCTCGCAACGGAGCAGGTGCTGAAGAACGGGTGACGAC  
TCTGCCGCTGGGCGGTGGCAAGGGCGGTGCGACTTCAACCCCAAGGGACGCTCTGAGGCGGAGGTGCGTCGCTTTTGCCAGGCCCTTATG  
GGTGCTCTGGCTCGCCACATTGGTCCCGACACGGATGTTCTGCTGGTGACATTGGCGTGTCCGGCCGGGAGATTGGCTACCTGTTTGAGC  
GTACAAGCGCGCGACCAACCGGTTTGAGGGCATCCTACCGGGAAGGGCCCGACGTTTGGGGGCTCCCTCATCCGGCCCGAGTCCACGGGC  
TACGGCGTGGTTCATGTTTGTGCGTGAGATGCTCAAGGTCAAGGGCGATACGCTGGAAGGCAAGGTGGTTCATATTCCGGCTCTGGCAACGT  
AGCGCAGTACGCGACGGAGAAGGTGAACGCGCTGGGCGGCAAGGTCATTGCGTGTCCGACTCGAAGGGCGTCTCTGTTGATGAGGAGGG  
CATCACGGACAAGAAGCTGGCCGAGGTTCATGGACATCAAGAAGCTCCGCCGACGTCGCTCAAGGCGTACACGGAGAAGTTTTCGAGTGC  
CAAGTGGACGGACTTTTCCGAGCAGTACACGGACGAGGATAAGAAGTCAAACCCACTGTGGGAGGTCAAGTGTGACGTGGCTCTGCCGTGC  
GCCACGCAGAACGAGCTCAACGCGGCCGCGGCCAGGCGTGGTGACAATGGTGTACGATTGTTGCGGAGGGGGCCAAACATGCCCTCG  
ACGCCGGGTGCCATCGAGGTGTGCGCTCGGCCAAGACTGCATTGCGCCTGGCAAGGCGAGCAACGCCGGTGGGGTGGCCACGAGCGGA  
CTCGAGATGTGCAAAACTCGCAGCGCATGGCGTGGTCTGCGGAGAAGGTGGAGGAGGAGTGGATGGGATCATGACCCGCATCCATGCC  
GACTGCGTGAAGACGGCCAAGGCGTACGACCGGGCTGGGGACTATGTGTTTGGCGCCAACGTGACGGGCTTCTCAAGGTTGCTGAGGCTA  
TGCTGGCGCAGGGGCTTGCCTGA

#### PhGDH2

ATGGCGACGCGGCAGGGGGGTTCCCGCCGCGCTCCCCCACC GCCGCTCCTGCCCCGCCGTCGCTGCTGCTGGCGTGGCGGGTCT  
CGCTCCCTGTACCCCCCCCACGGTCCGTGCGGGACGCCGCCGCGGTTGCCGCCGTTGGCGGGCGGCCGCCGCTCCACCACCACT  
GCGAGCGGCGGTCCGCCGCCGCGACGTCGCCCGGGCGCGGCCAAAGGCGAGCCAGAAGGGGGCACCTTCTCGAGGGCGTCGACGCC  
AACTTTCGGGCGGCGAGCGCGACCTGCGGTGCGTGGACCCGCGCTGCTGGAGAATATCCGCCGTGCAACAGCAGACCGAGTTTGCCT  
TTCCGCTCAAGCGGGACGACGGGAGCATCACCACCTACCGGCTACCGGGCGGTGCATTCTGATACCATATGACGCCGTCCAAGGGCGGCAT  
CCGCTACGCGCCGTCCGTGTGCGGTCCGAGGTGGAGGCGCTCGCATGCCTGATGACGCTCAAGTGTGCGGTGCTGGAGGTGCCGTACGGG  
GGGGCCAAGGGGGGGTGGCCATCAACCGCGTGACTACTCGCCGGCAGAGGTGGAGCGCATACCCGCCGCTTACGACTGAGCTGTAC  
CGGCGCAACCTGATCGGCCCGCGGTGGACGTGCCGGCGCCGACTTTGGACCAACCGCGGGGACATGGCGCACATTAAGGATACGTAC  
ATGCAGCTGGAGGGCAAGTCGATGTTTGGGGCGGCGCGGTGACGGGCAAGCCCGTCAGCCAGGGGGGCATCCGCGGGCGGGAGGAGGC  
CACCGGCCCTGGCGTCTACTTTGGCGTCCGCGAGTCTGTCCGACCCGTCGGTCCGGCGGCGCGGGGTGCCACCCCGTGGAGCGTCC  
CAAAGTCGACGTTTGCCATCCAGGGGCTTGCAACGTGCGTACTGGGCCGCCACTTTATTGCCAAGAATGGCGGCCTCATCAGGCCGTC  
GGCGAGCGGGACGGGACCGTGTGCGACCCGCGGGTGTGGACGTGGAGGCCCTCAAGGTGCACCTGACCACTAATGGTGGCACGGTGGTC  
GGCTTTACCAATGGCGGCAGCCGTCGCTGTGCGGTGATGCCCCACCCGTCGCTCGTCTGTCTGCCGACGTGGACGTGCTCATCCCGCGGC  
GCTGGAAGGCGCCATCAGACCGCCAACGCGGGCGGTGCGCGCCAAGGTGGTCCGAGGGCGCCAATGGCCCCGTCAGTGTGGCGC  
GGACGTGGTACTCGCCTCCGCCGGCGTGGTGGTCTCCCCGACCTGGTCATGAACGCCGGCGCGGTGACGGTGAGCTACTTTGAGGTGGCCA  
AGAACTTGGCGGGCTCCGCTTTGGGCGGTGACCCAGCGCGGAGGAGGCGCGATGGAGAACCTGCTCGCGACACTGCAGACCCACG

CGGTCACCATCACCGACCGCGACCGCGGGCTGATCATTGGCGCCGACGAGCGCGCACGTGTACAGCGGGCTGGAGGACAGCATGT  
 GCGCGGCGTGTGGGGAGACGGTCAAGGTGGCCGCGGAGCTGGGCGTGTGCTCCGCATCGCCGCCTACTACACCGCCATCCGGCGGGTGGC  
 CGACACGTTTGAGAGCCGCGGGCTGTGGCCTTGA

**Table S5.** Primer required for experiment.

| <b>Name</b> | <b>Forward primer</b>                             | <b>Reverse primer</b>                             |
|-------------|---------------------------------------------------|---------------------------------------------------|
| PhGDH1      | 5'- <u>CCGGAATTC</u> ATGTCGGGCCTGTCGGCCAAGCTGC-3' | 5'- <u>CCCAAGCTT</u> CAGGCAAGCCCCTGCGCCAGCATA-3'  |
| PhGDH2      | 5'- <u>CCGGAATTC</u> ATGGCGACGCGGGCAGGGGGGTTC-3'  | 5'- <u>CCCAAGCTT</u> TCAAGGCCACAGCCCGCGGCTCTCA-3' |
| K137D       | 5'-TCAACCCCGATGGACGCTCTGAGGCGGAGGTGCG-3'          | 5'-AGCGTCCATCGGGGTTGAAGTCCGACCCGCCCTT-3'          |
| S293D       | 5'-GCCGCACGGATCTCAAGGCGTACACGGAGAAGTT-3'          | 5'-CCTTGAGATCCGTGCGGCGGACGTTCTTGATGTC-3'          |
| G193D       | 5'-TCAACCGCGATGACTACTCGCCGGCAGAGGTGGA-3'          | 5'-AGTAGTCATCGCGGTTGATGGCCACCCCCCCTT-3'           |
| T361D       | 5'-ATGGTGGCGATGTGGTCGGCTTTACCAATGGCGG-3'          | 5'-CGACCACATCGCCACCATTAGTGGTCAGGTGCAC-3'          |
| qPhGDH1     | 5'-GATTCTCCACTCGTTGGGTC-3'                        | 5'-CCCGATAGCCGAGTTCATTT-3'                        |
| qPhGDH2     | 5'-GAGTTTGCCTTTCCGCTCAA-3'                        | 5'-GCACACTTGAGCGTCATCA-3'                         |
| EF2         | 5'-CTGTCCAAGAGTGCGAACAAG-3'                       | 5'-CTCGTCCATGCCATACTCGT-3'                        |
